# Supplementary material for: Antiviral antibody responses to systemic administration of an oncolytic RNA virus: the impact of standard concomitant anticancer chemotherapies
Source: PubMed Central journal article supplement (PMC8728387; doi:10.1136/jitc-2021-002673), 2021-07-21
Supplement: jitc-2021-002673supp002.pdf [file jitc-2021-002673supp002.pdf]

# ← Escalating Reovirus Dose

## REO+GEM

Reovirus + Gemcitabine Cohort 2

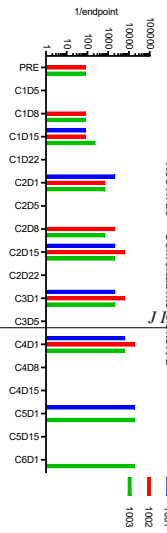

Reovirus + Gemcitabine Cohort 3

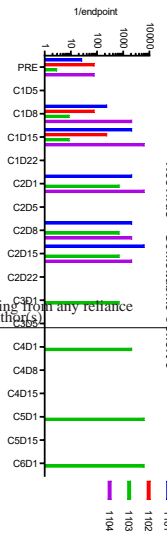

Reovirus + Gemcitabine Cohort 4

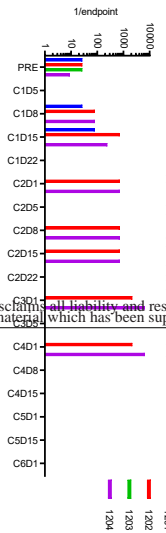

Reovirus + Gemcitabine Cohort 5

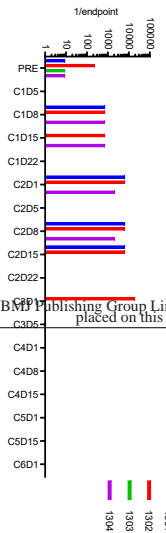

## REO+DOC

Reovirus + Docetaxel Cohort 1

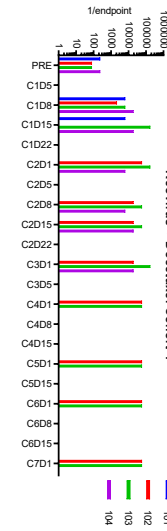

Reovirus + Docetaxel Cohort 2

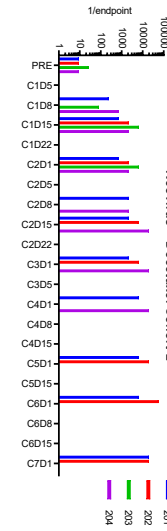

Reovirus + Docetaxel Cohort 3 (patients 1-6)

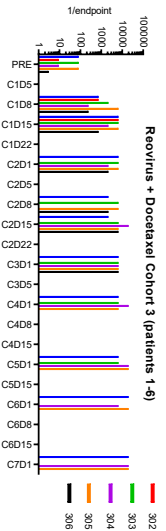

Reovirus + Docetaxel Expansion Cohort (patients 7-12)

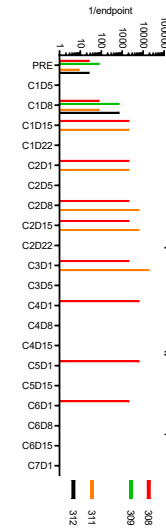

Reovirus + Docetaxel Expansion Cohort (patients 13-17)

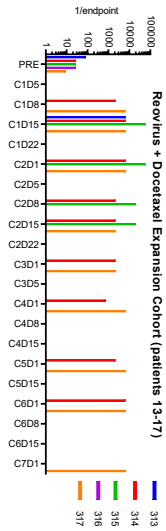

## REO+CAR+PAC

Reovirus + Carboplatin + Paclitaxel Cohort 1

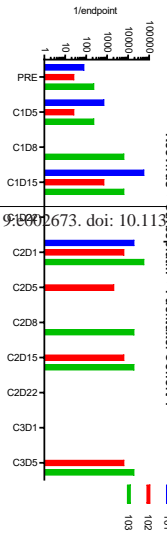

Reovirus + Carboplatin + Paclitaxel Cohort 2

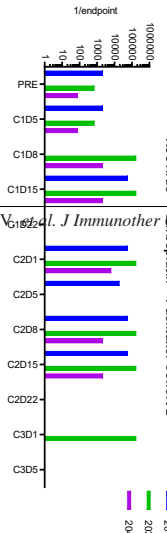

Reovirus + Carboplatin + Paclitaxel Cohort 3

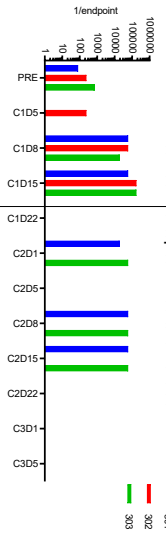

Reovirus + Carboplatin + Paclitaxel Expansion Cohort

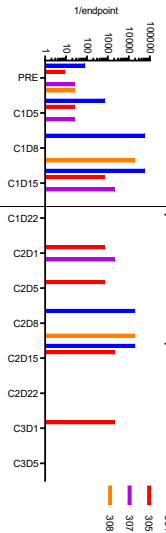

Supplemental material

BMJ Publishing Group Limited (BMJ) disclaims all liability and responsibility arising from any reliance placed on this supplemental material which has been supplied by the author(s)

*J Immunother Cancer*
