# Supplementary material for: Antiviral antibody responses to systemic administration of an oncolytic RNA virus: the impact of standard concomitant anticancer chemotherapies
Source: PubMed Central journal article supplement (PMC8728387; doi:10.1136/jitc-2021-002673), 2021-07-21

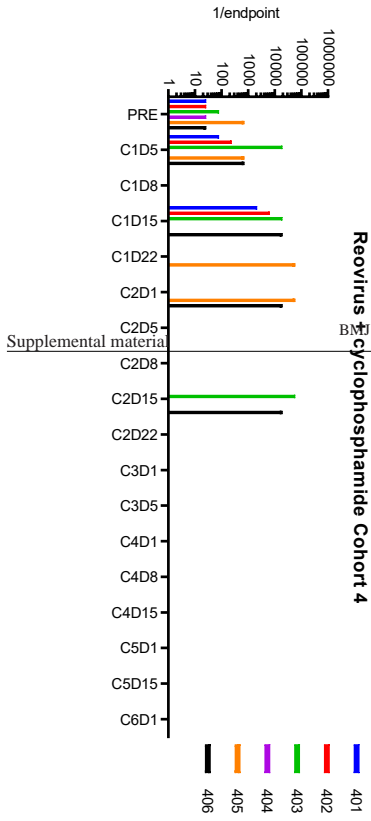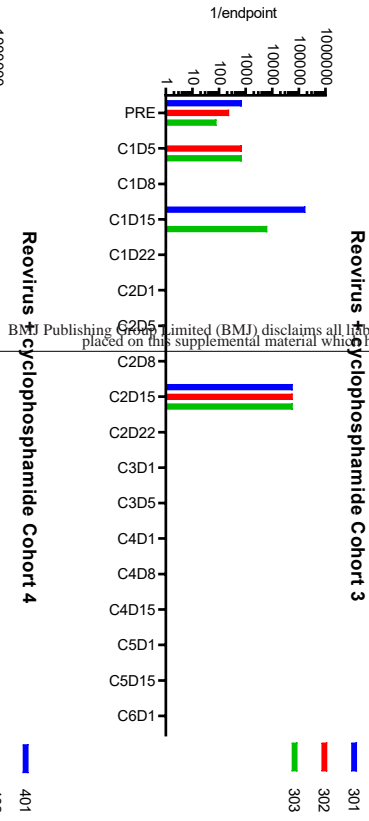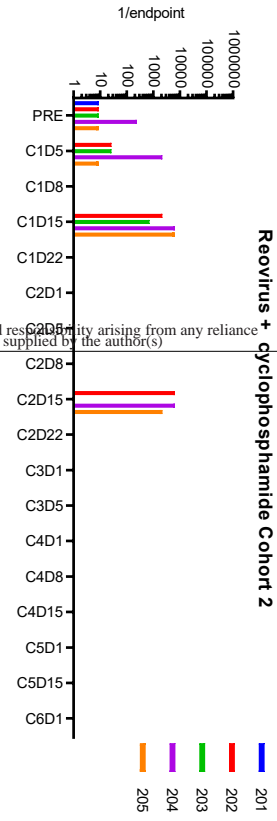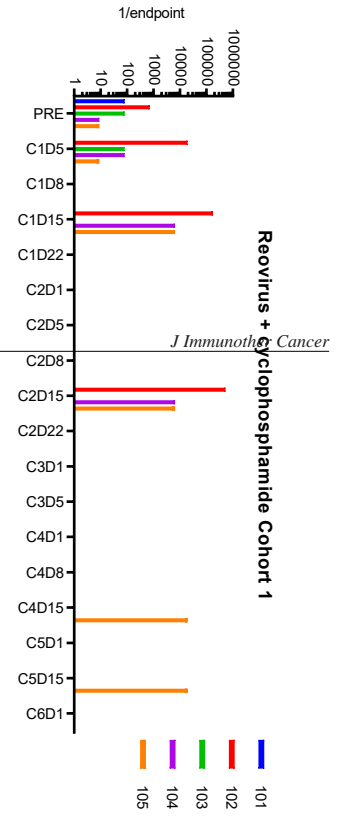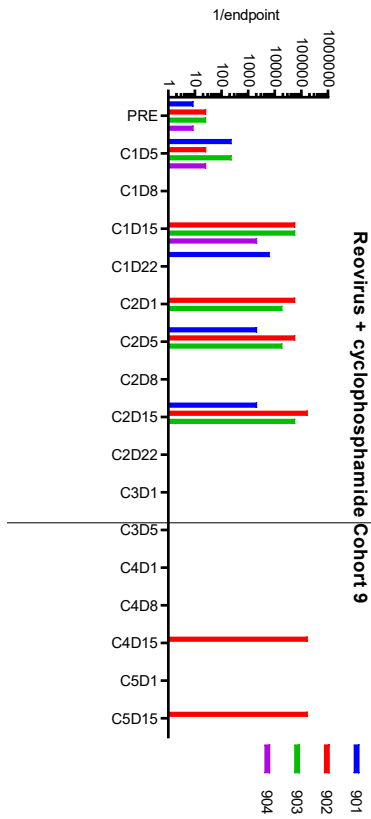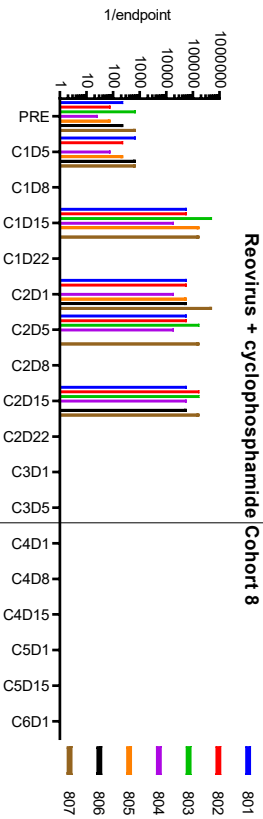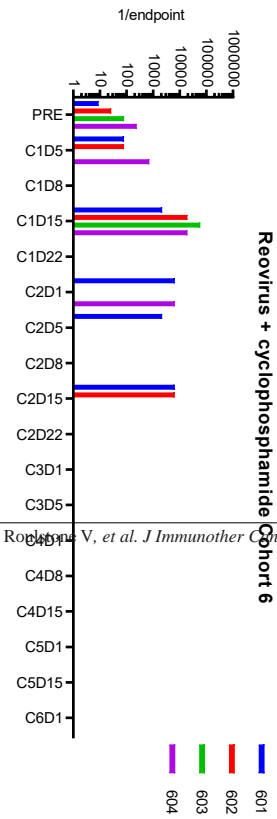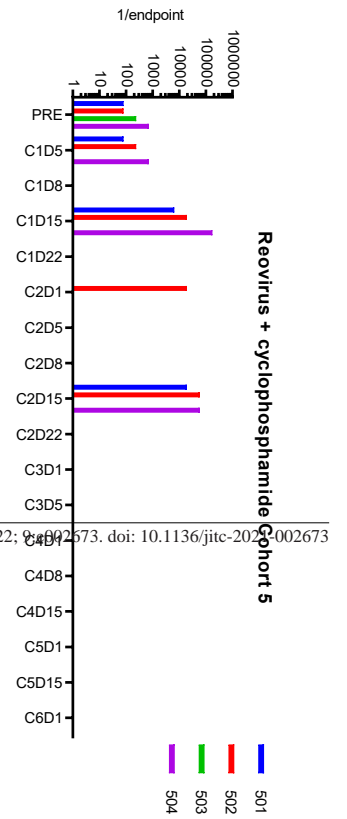

Supplement: jitc-2021-002673supp003.pdf [file jitc-2021-002673supp003.pdf]
