# Supplementary material for: Antiviral antibody responses to systemic administration of an oncolytic RNA virus: the impact of standard concomitant anticancer chemotherapies
Source: PubMed Central journal article supplement (PMC8728387; doi:10.1136/jitc-2021-002673), 2021-07-21
Supplement: jitc-2021-002673supp004.pdf [file jitc-2021-002673supp004.pdf]

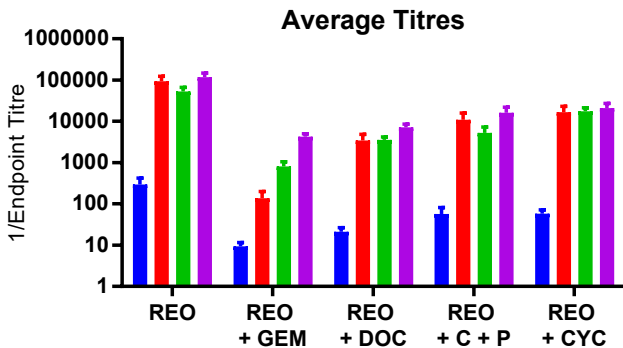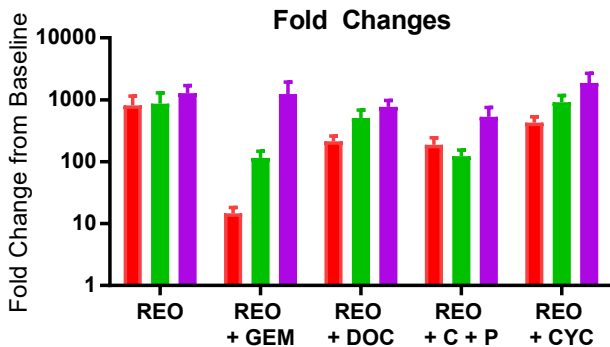

|                                            |                                            |
|--------------------------------------------|--------------------------------------------|
| <span style="color: blue;">█</span> PRE    | <span style="color: red;">█</span> C1D15   |
| <span style="color: green;">█</span> C2D15 | <span style="color: purple;">█</span> Peak |
